# Supplementary material for: Assessment of the effect of sphingosine kinase inhibitors on apoptosis,unfolded protein response and autophagy of T-cell acute lymphoblastic leukemia cells; indications for novel therapeutics
Source: PubMed Central journal article supplement (PMC4202168; doi:10.18632/oncotarget.2318), 2014-08-06
Supplement: oncotarget-05-7886-s001.pdf [file oncotarget-05-7886-s001.pdf]

# Assessment of the effect of sphingosine kinase inhibitors on apoptosis, unfolded protein response and autophagy of T-cell acute lymphoblastic leukemia cells; indications for novel therapeutics

## Supplementary Material

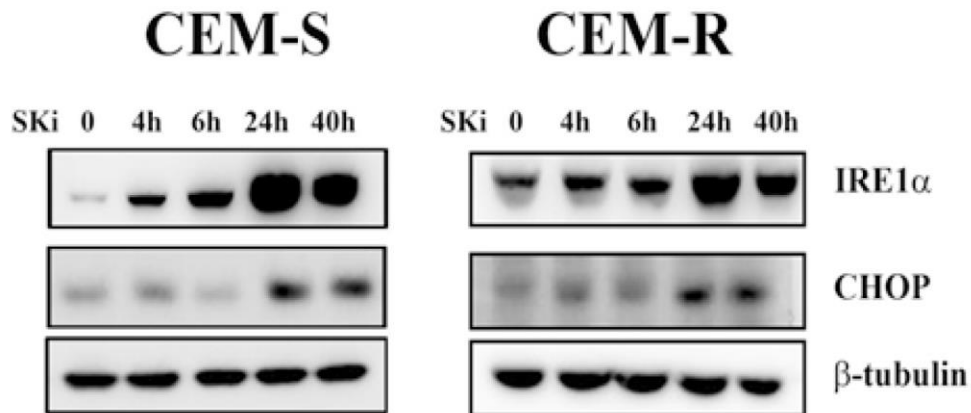

**Supplementary Figure 1:** Western blot analysis for IRE1 $\alpha$  and CHOP in CEM-S and CEM-R cells treated with SKi for short (4 and 6 h) and long times (24 and 40 h). Fifty  $\mu$ g of protein was loaded for each lane.  $\beta$ -tubulin was used as a loading control.

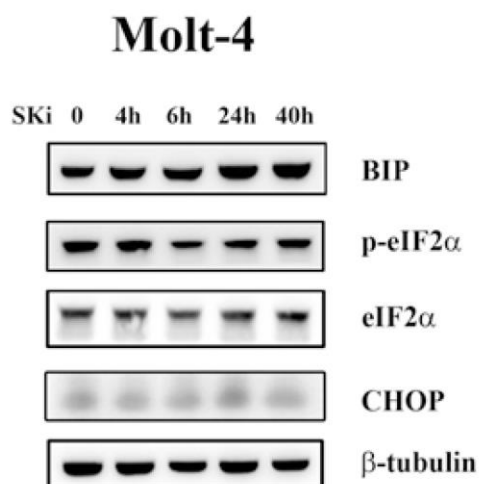

**Supplementary Figure 2:** Western blot analysis for BIP, p-eIF2 $\alpha$ , total eIF2 $\alpha$ , and CHOP in Molt-4 cells treated with SKi for 4, 6, 24, and 40 h. Fifty  $\mu$ g of protein was loaded for each lane.  $\beta$ -tubulin was used as a loading control.
